# Supplementary material for: Efficient (Bio)emulsification/Degradation of Crude Oil Using Cellulose Nanocrystals
Source: MDPI journal article supplement (doi:10.3390/polysaccharides4040024), 2023-11-10
Supplement: s1 [file s1]

## Supplementary Material

# Efficient (Bio)emulsification/Degradation of Crude Oil Using Cellulose Nanocrystals

Petr Sitnikov <sup>1</sup>, Philipp Legki <sup>1</sup>, Mikhail Torlopov <sup>1</sup>, Yulia Druz <sup>1</sup>, Vasily Mikhaylov <sup>1</sup>, Dmitriy Tarabukin <sup>2</sup>, Irina Vaseneva <sup>1</sup>, Maria Markarova <sup>2,3</sup>, Nikita Ushakov <sup>1</sup> and Elena Udoratina <sup>1,\*</sup>

<sup>1</sup> Institute of Chemistry, Komi Science Centre, Ural Branch of the Russian Academy of Sciences, Pervomayskaya Str. 48, Syktyvkar 167000, Russia

<sup>2</sup> Institute of Biology, Komi Science Centre, Ural Branch of the Russian Academy of Sciences, Kommunisticheskaya Str. 28, Syktyvkar 167982, Russia

<sup>3</sup> Federal Scientific Vegetable Center, Selectionnaya Str. 14, VNISSOK, Odintsovo District, Moscow 143072, Russia

\* Correspondence: udoratina-ev@chemi.komisc.ru

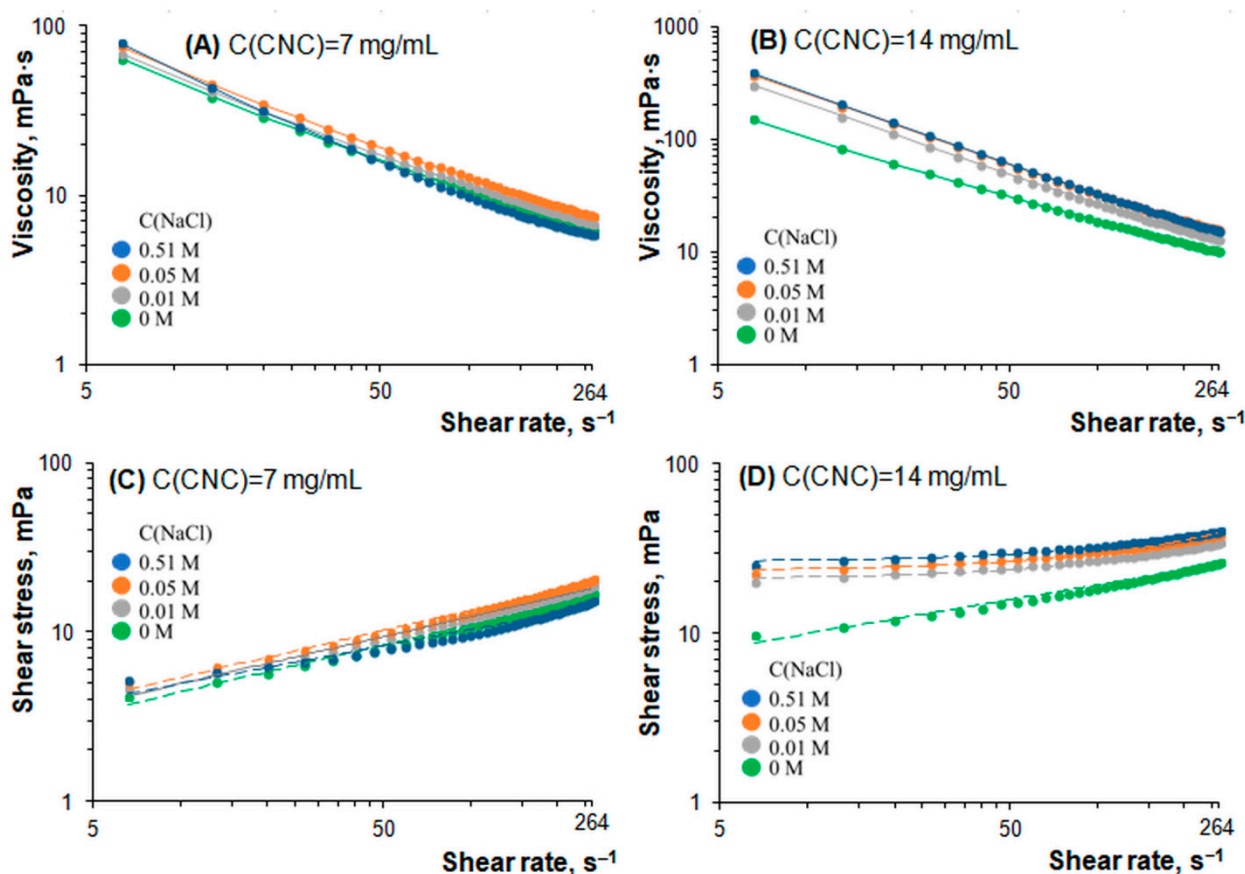

**Figure S1.** Effect of NaCl addition and CNC concentration on the flow behavior of nanocellulose stabilized liquid paraffin o/w emulsion: (A,B) flow profiles; (C,D) rheological profiles. Experimental data of rheological profiles presented as the dots, the broken lines are fitting curves, which have highest  $r^2$  coefficient.

**Table S1.** Dynamic viscosity of CNC-stabilized o/w emulsions at different CNC and salt concentrations, mPa·s

| CNC,<br>mg/mL | C(NaCl), M | Co/w               |                    |                     | Liquid Paraffin o/w Emulsion |                    |                     |
|---------------|------------|--------------------|--------------------|---------------------|------------------------------|--------------------|---------------------|
|               |            | 26 s <sup>-1</sup> | 52 s <sup>-1</sup> | 251 s <sup>-1</sup> | 26 s <sup>-1</sup>           | 52 s <sup>-1</sup> | 251 s <sup>-1</sup> |
| 7             | 0          | 12.6±0.7           | 8.8±0.5            | 4.5±0.3             | 24.4±0.6                     | 15.8±0.4           | 6.5±0.1             |
|               | 0.01       | 17.4±0.4           | 11.3±0.3           | 5.1±0.3             | 26.2±0.7                     | 16.8±0.2           | 7.0±0.1             |
|               | 0.05       | 22.9±0.8           | 14.3±0.2           | 6.1±0.2             | 29.0±0.5                     | 18.7±0.7           | 7.8±0.2             |
|               | 0.51       | 21.5±0.6           | 13.7±0.4           | 6.4±0.2             | 35.6±0.8                     | 15.2±0.6           | 6.0±0.1             |
| 14            | 0          | 59.2±1.1           | 33.7±0.9           | 11.3±0.2            | 49.2±1.7                     | 29.5±0.3           | 10.3±0.2            |
|               | 0.01       | 67.1±0.7           | 37.6±0.7           | 12.4±0.1            | 86.2±1.1                     | 46.6±0.8           | 13.0±0.2            |
|               | 0.05       | 107.9±0.5          | 58.9±0.8           | 16.7±0.1            | 105.2±0.9                    | 56.8±0.5           | 16.3±0.1            |
|               | 0.51       | 102.9±0.8          | 56.9±0.5           | 17.2±0.1            | 107.9±1.1                    | 57.4±0.7           | 15.8±0.2            |

**Table S2.** Rheological parameters of CNC-stabilized liquid paraffin o/w emulsion o/w emulsions at different CNC and salt concentrations

| CNC,<br>mg/mL | C(NaCl), M | Bingam model      |                    |       |                                    | Power law |       |                                       |       |
|---------------|------------|-------------------|--------------------|-------|------------------------------------|-----------|-------|---------------------------------------|-------|
|               |            | $\tau_0$ ,<br>mPa | $\mu_p$ ,<br>mPa·s | $r^2$ | $\mu_a^B$<br>(50 s <sup>-1</sup> ) | K         | n     | $\mu_a^{pl}$<br>(50 s <sup>-1</sup> ) | $r^2$ |
| 7             | 0          |                   |                    | 0.950 |                                    | 1.776     | 0.396 | 0.167                                 | 0.993 |
|               | 0.01       |                   |                    | 0.950 |                                    | 1.989     | 0.395 | 0.187                                 | 0.993 |
|               | 0.05       |                   |                    | 0.950 |                                    | 2.369     | 0.320 | 0.166                                 | 0.960 |
|               | 0.51       |                   |                    | 0.989 |                                    | 2.168     | 0.395 | 0.203                                 | 0.992 |
| 14            | 0          |                   |                    | 0.932 |                                    | 5.119     | 0.288 | 0.315                                 | 0.987 |
|               | 0.01       | 20.919            | 0.053              | 0.971 | 0.472                              |           |       |                                       | 0.951 |
|               | 0.05       | 23.429            | 0.059              | 0.972 | 0.528                              |           |       |                                       | 0.950 |
|               | 0.51       | 26.437            | 0.055              | 0.970 | 0.584                              |           |       |                                       | 0.947 |
